# Supplementary material for: miR-125b and miR-100 Are Predictive Biomarkers of Response to Induction Chemotherapy in Osteosarcoma
Source: Sarcoma. 2016 Nov 21;2016:1390571. doi: 10.1155/2016/1390571 (PMC5136640; doi:10.1155/2016/1390571)
Supplement: Supplementary file 1 — List of supplementary materials Supplementary List Supplementary Figure 1 Effects of expression of miR-100 and miR-125b on drug sensitivity Supplementary Figure 2 Effects of miR-100 and miR-125b on apoptosis Supplementary Table 1 Expression data of six miRNAs by microarray Supplementary Table 2 Expression data of six miRNAs by qRT-PCR Supplementary Table 3 miRNAs changed sensitivity to chemotherapy drugs Supplementary Table 4 Genes the expression of which was affected by miRNA-100 transfection Supplementary Table 5 Genes the expression of which was affected by miRNA-125b transfection Legends of supplementary figures Supplementary Figure 1 Effects of expression of miR-100 and miR-125b on drug sensitivity. Expression of miR-100 and miR-125b was silenced in MNNG/HOS (A, B, C), 123B (D, E, F), and MG63 (G, H, I) cells, which were then exposed to methotrexate (A, D, G), doxorubicin (B, E, H), and cisplatin (C, F, I). IC50 values are summarized in Supplementary Table 3. Supplementary Figure 2 Effects of miR-100 and miR-125b on apoptosis. Expression of apoptosis proteins was measured before and after transfection with miRNA-125b (A). Over-expression of miRNA-125b decreased expression of Bak1, p53, Caspase-2, MCL-1, PUMA, and PP2A catalytic α (A). miRNA-125b partially blocked the ability of methotrexate (MTX), doxorubicin (DOX), and cisplatin (CDDP) to suppress expression of Bak1 (B, upper panel), and induce cleaved PARP (B, middle panel). On the other hand, miR-100 inhibited the Rb pathway (C). [file 1390571.f1.xlsx]

## Sheet: Supplementary Table 1
	Supplementary Table 1. Expression data of six miRNAs by microarray
	miRNA	p-value	FCAbsolute	regulation
	hsa-miR-483-3p	0.036	8.87	upA
	hsa-miR-100	0.013	6.85	upA
	hsa-mIR-124	0.037	5.37	upA
	hsa-miR-125b	0.028	7.75	upA
	hsa-miR-127-3p	0.043	6.34	upA
	hsa-miR-887	0.046	1.91	downB
	A: up in poor-responders
	B: down in poor-responders

## Sheet: Supplementary Table 2
	Supplementary Table 2. Expression data of six miRNAs by qRT-PCR
		Good responder					Poor responder
		OS1	OS2	OS3	OS4		OS5	OS6	OS7	OS8		p-value
	miR-125b	7.56846	39.6706	102.537	53.0765		75.5835	541.193	120.259	315.173		0.043
	miR-100	7.56846	12.8171	50.9143	28.443		69.0706	166.572	55.7152	148.056		0.021
	miR-124	0.130308	2.26577	1.61328	0.248273		1.44393	2.65737	0.466516	0.175556		0.773
	miR-127-3p	0.231647	0.15932	1.16473	0.189465		0.019915	63.1189	1.22264	2.42839		0.248
	miR-483-3p	0.217638	0.015625	0.590496	0.353553		0.016176	1.85318	19.5622	0.806642		0.149
	miR-887	0.339151	0.0947323	0.303549	0.339151		0.10083	0.486327	0.323088	0.157127		1

## Sheet: Supplementary Table 3
	SuppmentaryTable 3. miRNAs changed sensitivity to chemotherapy drugs
		IC50	control	miR-125b	miR-100
	MNNG/HOS	MTX (uM)	1.05	4.03*	2.52*
		DOX (uM)	0.18	0.37*	0.25NS
		CDDP (uM)	5.7	7.32*	6.97*
			control	si-PRDX2-1	si-PRDX2-3
	MG63	MTX (uM)	3.09	7.74*	7.18*
		DOX (uM)	0.065	0.074*	0.073*
		CDDP (uM)	2.91	1.63*	2.57*
			control	si-PRDX2-1	si-PRDX2-3
	143B	MTX (uM)	1.49	3.97*	3.21*
		DOX (uM)	0.064	0.072*	0.077*
		CDDP (uM)	12.31	14.07*	14.52*
	* p < 0.05
	NS: No significant difference

## Sheet: Supplementary Table 4
	Supplementary Table 4 Genes the expression of which was affected by miRNA-100 transfection
	Accession number	Symbol	Gene title	Fold change
	Up-regulated genes
	NM_006868	RAB31	RAB31, member RAS oncogene family	3.17
	NM_145267	C6orf57	chromosome 6 open reading frame 57	2.92
	NM_012241	SIRT5	sirtuin (silent mating type information regulation 2 homolog) 5 (S. cerevisiae)	2.26
	NM_017629	EIF2C4	eukaryotic translation initiation factor 2C, 4	1.92
	NM_017440	MDM1	Mdm1 nuclear protein homolog (mouse)	1.79
	NM_181795	PKIB	protein kinase (cAMP-dependent, catalytic) inhibitor beta	1.75
	NM_001142864	PIEZO1	Piezo-Type Mechanosensitive Ion Channel Component 1	1.7
	NM_001039500	VWA5B1	von Willebrand factor A domain containing 5B1	1.68
	NM_144720	JAKMIP1	Janus kinase and microtubule interacting protein 1	1.64
	NM_002383	MAZ	MYC-associated zinc finger protein (purine-binding transcription factor)	1.61
	NM_001080837	SEBOX	SEBOX homeobox	1.6
	NM_001037317	LPPR5	phosphatidic acid phosphatase type 2	1.6
	NM_024009	GJB3	gap junction protein, beta 3, 31kDa	1.59
	NM_001007531	NKAPL	NFKB activating protein-like	1.59
	NM_004997	MYBPH	myosin binding protein H	1.57
	NM_000261	MYOC	myocilin, trabecular meshwork inducible glucocorticoid response	1.57
	NM_001012709	KRTAP5-4	keratin associated protein 5-4	1.55
	NM_014292	CBX6	chromobox homolog 6	1.54
	NM_015236	LPHN3	latrophilin 3	1.53
	NM_001080474	C2orf78	chromosome 2 open reading frame 78	1.53
	NM_016571	LGSN	lengsin, lens protein with glutamine synthetase domain	1.53
	NM_016366	CABP2	calcium binding protein 2	1.53
	NM_001009941	ANKRD1	ankyrin repeat domain 1 (cardiac muscle)	1.51
	NM_005041	PRF1	perforin 1 (pore forming protein)	1.5
	Down-regulated genes	Down-regulated genes
	NM_000576	IL1B	interleukin 1, beta	0.57
	NM_014510	PCLO	piccolo (presynaptic cytomatrix protein)	0.63
	NM_001017402	LAMB3	laminin, beta 3	0.63
	NM_005565	LCP2	lymphocyte cytosolic protein 2 (SH2 domain containing leukocyte protein of 76kDa)	0.64
	NM_004864	GDF15	growth differentiation factor 15	0.64
	NM_021102	SPINT2	serine peptidase inhibitor, Kunitz type, 2	0.64
	NM_014033	METTL7A	methyltransferase like 7A	0.65
	NM_000379	XDH	xanthine dehydrogenase	0.65
	NM_182507	KRT80	keratin 80	0.66
	NM_213602	SIGLEC15	sialic acid binding Ig-like lectin 15	0.66
	NM_020299	AKR1B10	aldo-keto reductase family 1, member B10 (aldose reductase); aldo-keto reductase family 1, member B10-like	0.67

## Sheet: Supplementary Table 5
	Supplementary Table 5 Genes the expression of which was affected by miRNA-125b transfection
	Accession number	Symbol	Gene title	Fold change
	Up-regulated genes	Up-regulated genes
	NM_006868	RAB31	RAB31, member RAS oncogene family	3.02
	NM_145267	C6orf57	chromosome 6 open reading frame 57	2.95
	NM_018254	RCOR3	REST corepressor 3	2.8
	NM_000261	MYOC	myocilin, trabecular meshwork inducible glucocorticoid response	2.36
	NM_012241	SIRT5	sirtuin (silent mating type information regulation 2 homolog) 5 (S. cerevisiae)	2.26
	NM_014286	NCS1	frequenin homolog (Drosophila)	1.83
	NM_019089	HES2	hairy and enhancer of split 2 (Drosophila)	1.8
	NM_006063	KBTBD10	kelch repeat and BTB (POZ) domain containing 10	1.79
	NM_001127464	ZNF469	zinc finger protein 469	1.78
	NM_014292	CBX6	chromobox homolog 6	1.77
	NM_006950	SYN1	synapsin I	1.75
	NM_007176	C14orf1	chromosome 14 open reading frame 1	1.75
	NM_004734	DCLK1	doublecortin-like kinase 1	1.74
	NM_001099408	EIF4E1B	eukaryotic translation initiation factor 4E family member 1B	1.72
	NM_005027	PIK3R2	phosphoinositide-3-kinase, regulatory subunit 2 (beta)	1.7
	NM_001039966	GPER	G protein-coupled estrogen receptor 1	1.68
	NM_002383	MAZ	MYC-associated zinc finger protein (purine-binding transcription factor)	1.66
	NM_001142864	PIEZO1	piezo-Type Mechanosensitive Ion Channel Component 1	1.66
	NM_014372	RNF11	ring finger protein 11	1.64
	NM_001037666	GATSL3	GATS protein-like 3	1.62
	NM_001159531	BEGAIN	brain-enriched guanylate kinase-associated homolog (rat)	1.62
	NM_020142	NDUFA4L2	NADH dehydrogenase (ubiquinone) 1 alpha subcomplex, 4-like 2	1.62
	NM_004997	MYBPH	myosin binding protein H	1.58
	NM_001004356	FGFRL1	fibroblast growth factor receptor-like 1	1.58
	NM_004585	RARRES3	retinoic acid receptor responder (tazarotene induced) 3	1.58
	NM_014353	RAB26	RAB26, member RAS oncogene family	1.58
	NM_004368	CNN2	calponin 2	1.57
	NM_001353	AKR1C1	aldo-keto reductase family 1, member C1 (dihydrodiol dehydrogenase 1; 20-alpha (3-alpha)-hydroxysteroid dehydrogenase)	1.56
	NM_206833	CTXN1	cortexin 1	1.56
	NM_015033	FNBP1	formin binding protein 1	1.56
	NM_006241	PPP1R2	protein phosphatase 1, regulatory (inhibitor) subunit 2	1.55
	NM_000147	FUCA1	fucosidase, alpha-L- 1, tissue	1.55
	NM_030929	KAZALD1	Kazal-type serine peptidase inhibitor domain 1	1.55
	NM_001547	IFIT2	interferon-induced protein with tetratricopeptide repeats 2	1.54
	NM_032532	FNDC1	fibronectin type III domain containing 1	1.54
	NM_078483	SLC36A1	solute carrier family 36 (proton/amino acid symporter), member 1	1.54
	NM_172229	KREMEN2	kringle containing transmembrane protein 2	1.53
	NM_002167	ID3	inhibitor of DNA binding 3, dominant negative helix-loop-helix protein	1.53
	NM_173595	ANKRD52	ankyrin repeat domain 52	1.52
	NM_153350	FBXL16	F-box and leucine-rich repeat protein 16	1.52
	NM_007177	FAM107A	family with sequence similarity 107, member A	1.52
	NM_000447	PSEN2	presenilin 2 (Alzheimer disease 4)	1.52
	NM_007326	CYB5R3	cytochrome b5 reductase 3	1.51
	NM_001143	AMELY	amelogenin, Y-linked	1.51
	Down-regulated genes	Down-regulated genes
	NM_013271	PCSK1N	proprotein convertase subtilisin/kexin type 1 inhibitor	0.36
	NM_004864	GDF15	growth differentiation factor 15	0.38
	NM_013409	FST	follistatin	0.43
	NM_016498	MTFP1	mitochondrial Fission Process 1	0.49
	NM_000576	IL8	interleukin 8	0.51
	NM_182507	KRT80	keratin 80	0.51
	NM_020396	BCL2L10	BCL2-like 10 (apoptosis facilitator)	0.53
	NM_025212	CXXC4	CXXC finger 4	0.55
	NM_003956	CH25H	cholesterol 25-hydroxylase	0.56
	NM_005155	PPT2	palmitoyl-protein thioesterase 2	0.56
	NM_203403	C9orf150	chromosome 9 open reading frame 150	0.57
	NM_001145026	PTPRQ	protein tyrosine phosphatase, receptor type, Q	0.57
	NM_024111	CHAC1	ChaC, cation transport regulator homolog 1 (E. coli)	0.58
	NM_213602	SIGLEC15	sialic acid binding Ig-like lectin 15	0.59
	NM_053054	CATSPER1	cation channel, sperm associated 1	0.59
	NM_139165	RAET1E	retinoic acid early transcript 1E	0.59
	NM_000576	IL1B	interleukin 1, beta	0.59
	NM_016084	RASD1	RAS, dexamethasone-induced 1	0.6
	NM_021158	TRIB3	tribbles homolog 3 (Drosophila)	0.6
	NM_002982	CCL2	chemokine (C-C motif) ligand 2	0.6
	NM_201525	GPR56	G protein-coupled receptor 56	0.6
	NM_024768	CCDC48	coiled-coil domain containing 48	0.6
	NM_001673	ASNS	asparagine synthetase	0.61
	NM_032883	TOX2	TOX high mobility group box family member 2	0.61
	NM_006547	IGF2BP3	insulin-like growth factor 2 mRNA binding protein 3	0.61
	NM_031866	FZD8	frizzled homolog 8 (Drosophila)	0.62
	NM_014344	FJX1	four jointed box 1 (Drosophila)	0.62
	NM_031455	CCDC3	coiled-coil domain containing 3	0.63
	NM_001806	CEBPG	CCAAT/enhancer binding protein (C/EBP), gamma	0.63
	NM_000104	CYP1B1	cytochrome P450, family 1, subfamily B, polypeptide 1	0.63
	NM_017754	UHRF1BP1	UHRF1 binding protein 1	0.64
	NM_000148	FUT1	fucosyltransferase 1 (galactoside 2-alpha-L-fucosyltransferase, H blood group)	0.64
	NM_000379	XDH	xanthine dehydrogenase	0.64
	NM_014313	TMEM50A	transmembrane protein 50A	0.64
	NM_005565	LCP2	lymphocyte cytosolic protein 2 (SH2 domain containing leukocyte protein of 76kDa)	0.64
	NM_033066	MPP4	membrane protein, palmitoylated 4 (MAGUK p55 subfamily member 4)	0.64
	NM_016233	PADI3	peptidyl arginine deiminase, type III	0.64
	NM_001017402	LAMB3	laminin, beta 3	0.65
	NM_014510	PCLO	piccolo (presynaptic cytomatrix protein)	0.65
	NM_001127232	UTS2	urotensin 2	0.65
	NM_003474	ADAM12	ADAM metallopeptidase domain 12	0.65
	NM_021213	PCTP	phosphatidylcholine transfer protein	0.66
	NM_001146157	FAM25A	family with sequence similarity 25, member A; family with sequence similarity 25, member B; family with sequence similarity 25, member G; family with sequence similarity 25, member C	0.66
	NM_001569	IRAK1	interleukin-1 receptor-associated kinase 1	0.67
